# Supplementary material
Source: PubMed Central journal article supplement (PMC3586823)
Supplement: NIHMS444583-supplement-Supplemental_Text.pdf [file NIHMS444583-supplement-Supplemental_Text.pdf]

## Supplementary Material

### S - materials and methods

#### *Northern blot analysis*

For northern blot analysis, equal amounts (10 µg) of total RNA for each sample were separated on an 0.8% agarose formaldehyde gel and transferred to a positively charged nylon filter (Amersham Biosciences). About 50 ng of an *AsgI* DNA fragment corresponding to the first 154 bp of *AsgI* coding sequence were PCR amplified (For primer, 5'- ATGGATCCTCAAGCTTTCATTCGT -3', Rev primer 5'- TTTGAACAGGAAAGCCTCGT -3') and labelled with [ $\alpha$ -<sup>32</sup>P] dCTP using the Ready-To-Go DNA labelling beads (Amersham Biosciences) following manufacturer's instructions. The hybridization was performed at 42°C in Perfect Hyb buffer (Sigma). The filters were washed at 42°C three times with 2X, 1X and 0.5X SSC, 0.1% SDS for 15 min.

#### *ABA extraction and quantification*

ABA was extracted from 1g of plant material per sample using water as described by Gomez-Cadenas and colleagues (2002) quantified using the Phytodetek ABA immunoassay kit (Idetek, Inc., Sunnyvale, CA).

**Table S1.** Primers used in this study

| Primer Name        | Sequence (5'-3')                                      |
|--------------------|-------------------------------------------------------|
| LP                 | CTGTCCCAACCCTGAGAAGTC                                 |
| RP                 | CATGCTCACTTGGAAATCTCG                                 |
| N2.1 ST1           | GTATGCGAGATCCGTCTTCGAGGTT                             |
| N2.1ST2            | GGCAGTGGGGTGAGTCCTGG                                  |
| AtN2.1 For         | GAATTGCGGTGTTGGTGGCA                                  |
| AtN2.1 Rev         | GACTGTGGGACAGAGACG                                    |
| 18S1               | TAGATAAAAGGTCGACGCGG                                  |
| 18S2               | CCCAAAGTCCAACACTACGAGC                                |
| 18S2 At            | CCCAAGGTTCAACTACGAGC                                  |
| Act For            | GGCTCCTCTTAACCCAAAGG                                  |
| Act Rev            | GAACCACCGATCCAGACT                                    |
| N2.1 ATG           | GGAGCTCTGACTAGAATGGATCCTCAGGC                         |
| N2.1 STOP          | TATACATCACCAGGAATGGCG                                 |
| CH11               | GAAACTGATGCATTGAACTTG                                 |
| AtN2.1DONRFor      | GGGGACAAGTTTGTACAAAAAAGCAGGCTATATGGATCCTCAAGCTTTCATTC |
| AtN2.1DONRevnostop | GGGGACCACTTTGTACAAGAAAGCTGGGTTCCAGGAGTAATGCCGGAAC     |
| N2.1 Prom left     | CCCAAGCTTTTAGAAGAAACAAATAATTG                         |
| N2.1 Prom right    | CCGGAATTCTAAATGTCAGAAATGTTTCC                         |

**Figure S1.** Quantification of ABA levels in wild-type potato (WT) and a transgenic line over-expressing *Asg1*(15A8) in control (0 mM NaCl) and salt stress (50 mM NaCl and 100 mM NaCl) conditions.

**Figure S2.** Expression analyses of Arabidopsis transgenic plants over-expressing *Asg1* (A) and *asg1* knockout mutants (SALK\_059272, *asg1*). A) Northern blot analysis of *Asg1* expression in T-3 homozygous single copy transgenic lines. A <sup>32</sup>P labeled *Asg1* fragment (1-150 of the coding sequence) was used as probe. b) RT-PCR analysis to confirm that the expression of *Asg1* is abolished in the mutant. The primers used were AtN2.1For + AtN2.1Rev. 18S ribosomal RNA was amplified as internal standard of the RT-PCR reaction.
