# Supplementary material
Source: PubMed Central journal article supplement (PMC3586823)

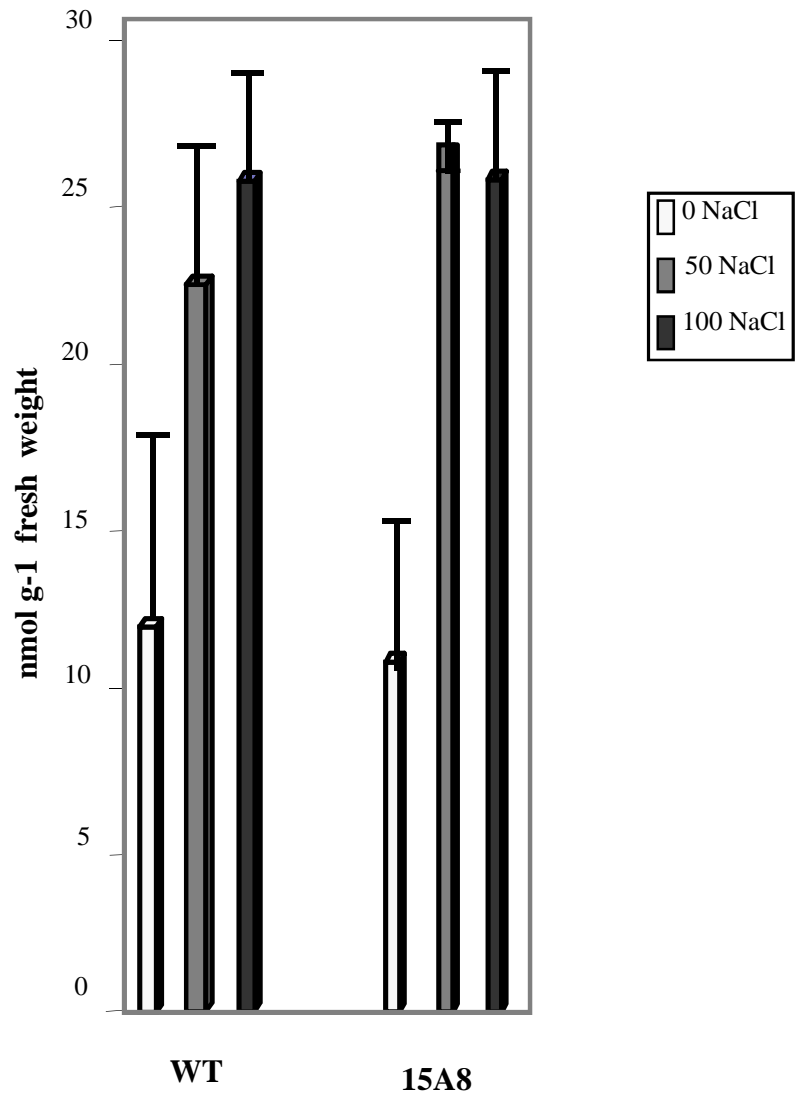

Fig. S1

A)

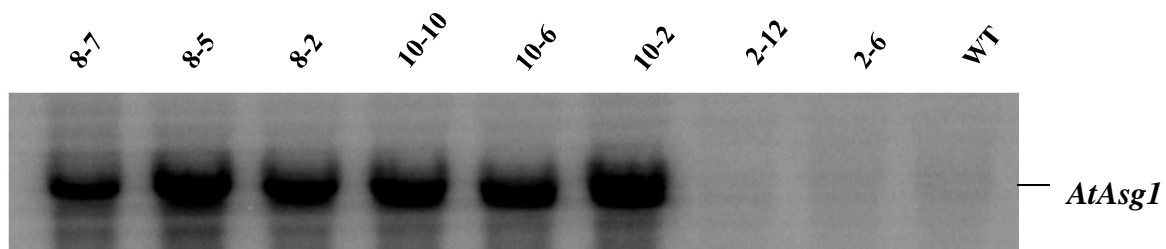

B)

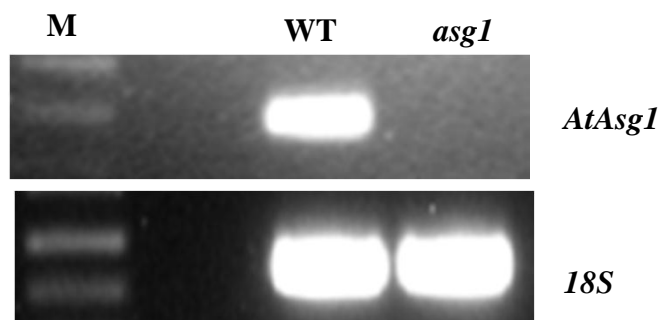

Fig. S2

Supplement: NIHMS444583-supplement-Figure_S1_and_S2.pdf [file NIHMS444583-supplement-Figure_S1_and_S2.pdf]
